# Supplementary material
Source: PubMed Central journal article supplement (PMC5752379)

## C

### Pairwise correlation

|                 | IFN-g   | TNF alpha | IL2     | IL4    | IL5    | IL10   | Median Survival |
|-----------------|---------|-----------|---------|--------|--------|--------|-----------------|
| IFN-g           | 1.0000  | 0.0865    | -0.0921 | 0.9899 | 0.2428 | 0.1358 | 0.9711          |
| TNF alpha       | 0.0865  | 1.0000    | 0.9388  | 0.1976 | 0.9196 | 0.9384 | 0.1648          |
| IL2             | -0.0921 | 0.9388    | 1.0000  | 0.0068 | 0.9318 | 0.9276 | 0.0196          |
| IL4             | 0.9899  | 0.1976    | 0.0068  | 1.0000 | 0.3438 | 0.2565 | 0.9832          |
| IL5             | 0.2428  | 0.9196    | 0.9318  | 0.3438 | 1.0000 | 0.9750 | 0.3726          |
| IL10            | 0.1358  | 0.9384    | 0.9276  | 0.2565 | 0.9750 | 1.0000 | 0.2836          |
| Median Survival | 0.9711  | 0.1648    | 0.0196  | 0.9832 | 0.3726 | 0.2836 | 1.0000          |

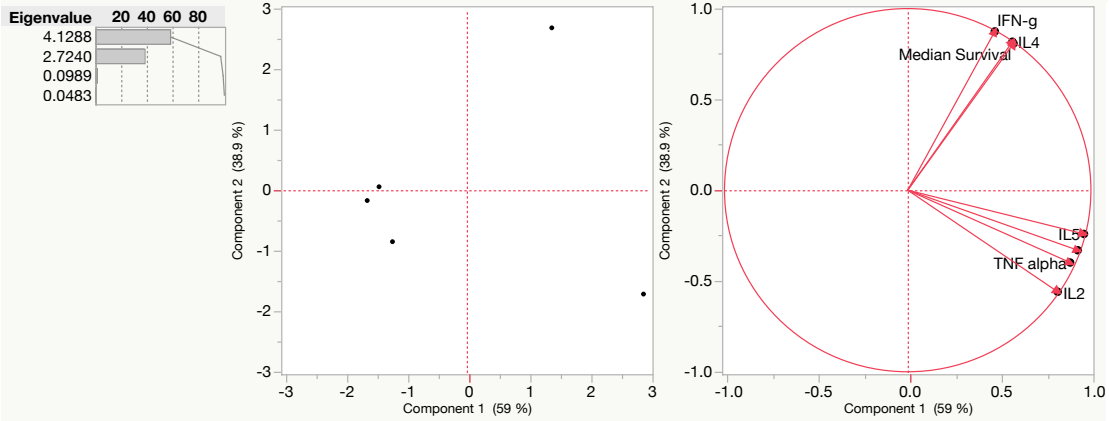

## D

### Pairwise correlation

|                 | Median Survival | CD4-IFNg | CD8-IFNg |
|-----------------|-----------------|----------|----------|
| Median Survival | 1.0000          | 0.3099   | 0.4207   |
| CD4-IFNg        | 0.3099          | 1.0000   | 0.9824   |
| CD8-IFNg        | 0.4207          | 0.9824   | 1.0000   |

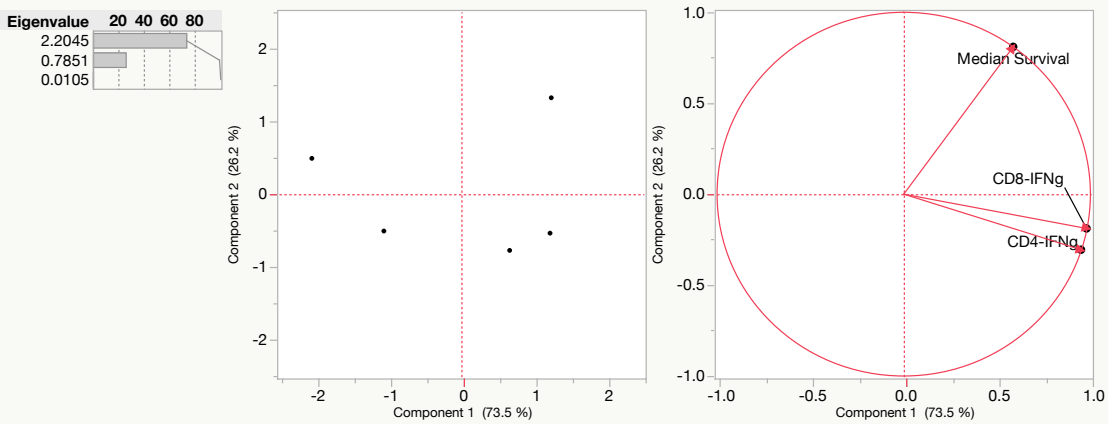

## E

### Pairwise correlation

|                    | Tregs   | monocytic MDSCs | Granulocytic MDSCs | Median Survival |
|--------------------|---------|-----------------|--------------------|-----------------|
| Tregs              | 1.0000  | 0.1789          | -0.1191            | -0.4307         |
| monocytic MDSCs    | 0.1789  | 1.0000          | -0.8574            | 0.4892          |
| Granulocytic MDSCs | -0.1191 | -0.8574         | 1.0000             | -0.6098         |
| Median Survival    | -0.4307 | 0.4892          | -0.6098            | 1.0000          |

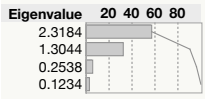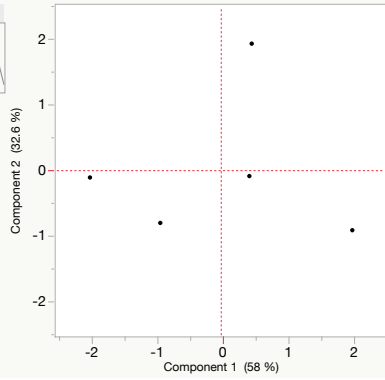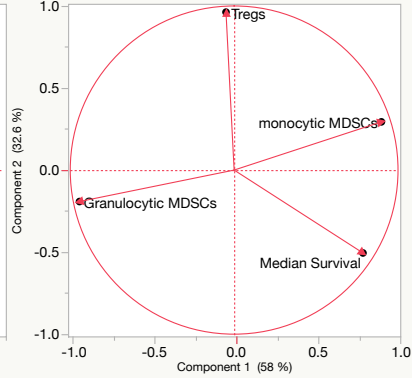

## F

### Pairwise correlation

|                   | Median Survival | B220+GL7+ B cells | IgG1-d21 |
|-------------------|-----------------|-------------------|----------|
| Median Survival   | 1.0000          | 0.9462            | 0.4293   |
| B220+GL7+ B cells | 0.9462          | 1.0000            | 0.4488   |
| IgG1-d21          | 0.4293          | 0.4488            | 1.0000   |

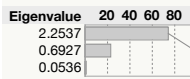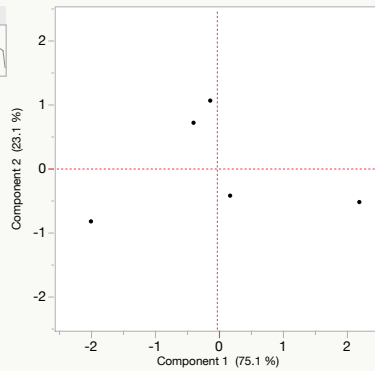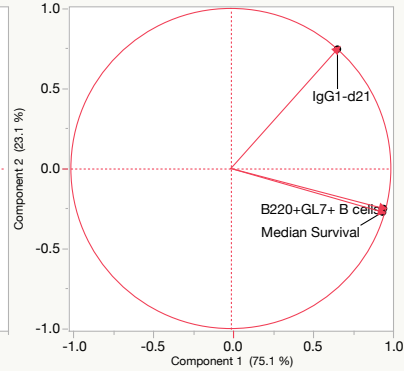

Supplement: jciinsight-2-92522-s005.pdf [file jciinsight-2-92522-s005.pdf]
