# Supplementary material
Source: PubMed Central journal article supplement (PMC5752379)
Supplement: jciinsight-2-92522-s001.pdf [file jciinsight-2-92522-s001.pdf]

**A**

| Formulation (n=4)                               | Size        | PDI         | Zeta        | Encapsulation efficiency (%) |
|-------------------------------------------------|-------------|-------------|-------------|------------------------------|
| Microparticle encapsulated tumor lysate (MP TL) | 1.84 ± 0.50 | 0.41 ± 0.17 | 0.61 ± 3.18 | 74.9 ± 7.6                   |

**B**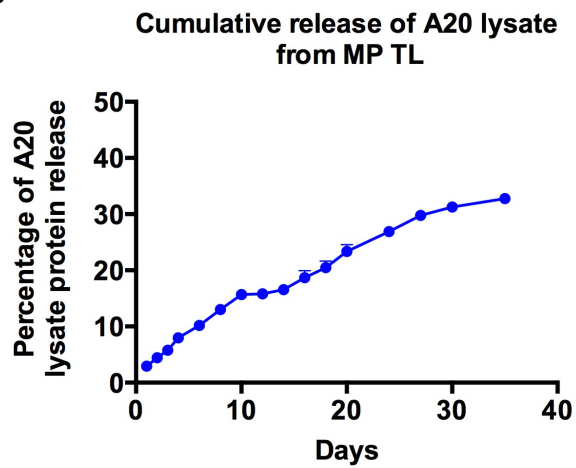

**Supplementary Figure 1** (A) Characterization of A20 lysate encapsulated PLGA microparticle formulation (described as MP TL; Size-  $\mu\text{m}$ , Zeta-mV) and (B) Cumulative release of A20 lysate protein from PLGA MP (n=4). Data represent Mean  $\pm$  S.D.

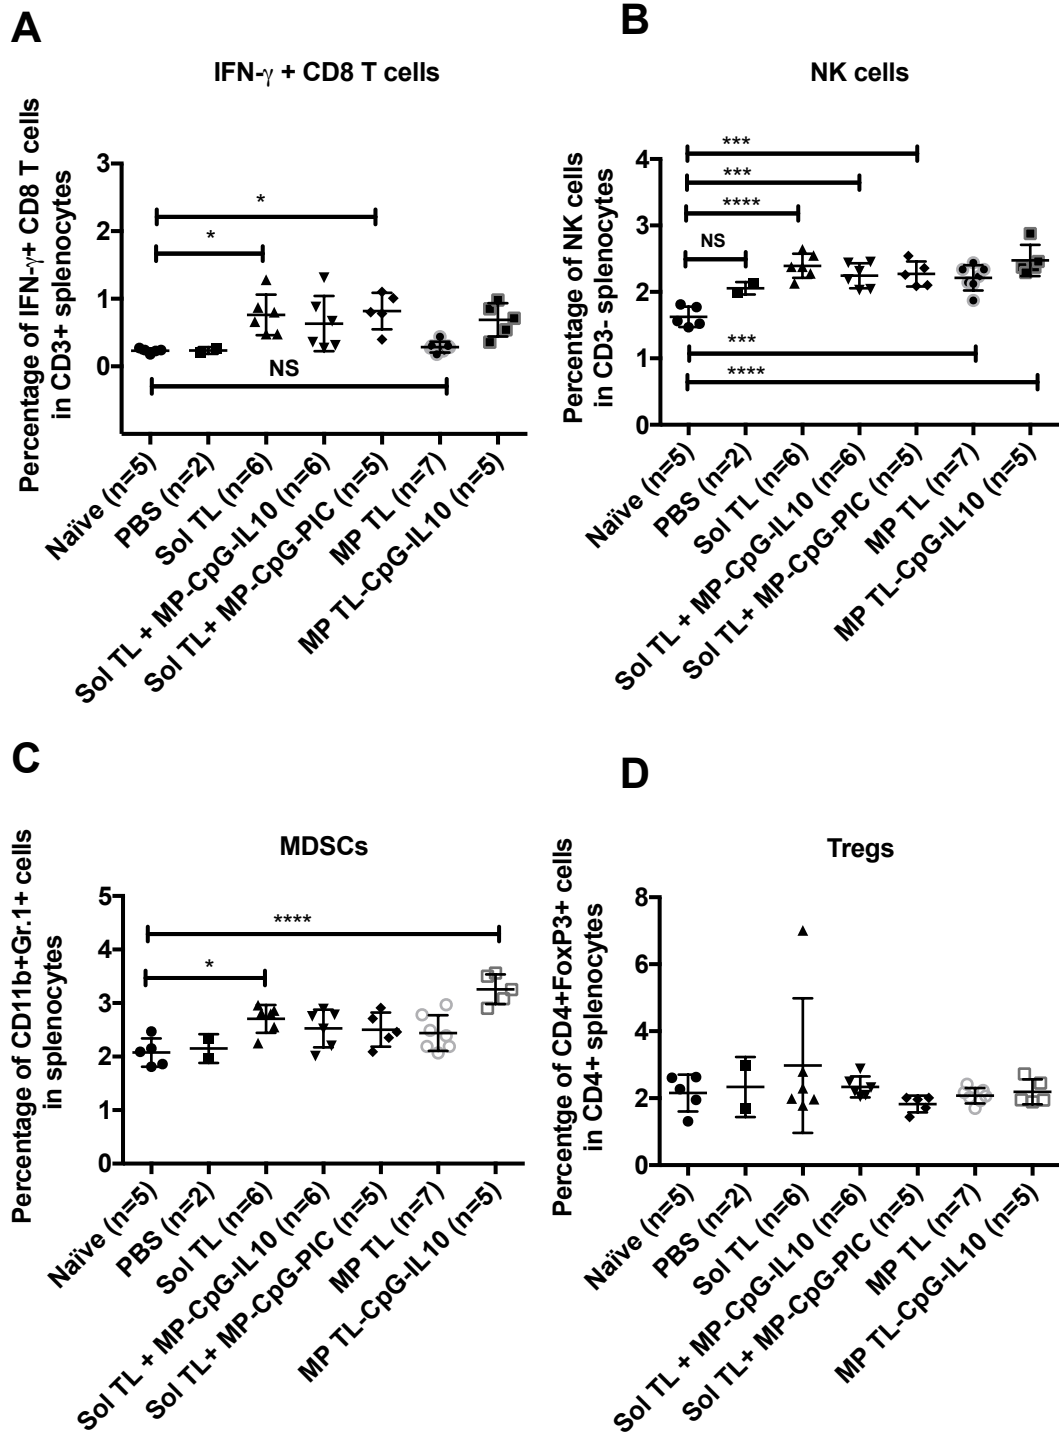

**Supplementary Figure 2.** (A) IFN- $\gamma$  secreting CD8<sup>+</sup> T cells percentage following re-stimulation of splenocytes with A20 tumor lysate ex vivo. Percentage of (B) NK cells, (C) MDSCs, and (D) Tregs in splenocytes. Naïve Balb/C mice were first injected with a lethal dose of A20 cells ( $2 \times 10^5$  cells/mice, IP) followed by 3 immunizations at days 8, 10, 14 with various tumor lysate formulations (100  $\mu$ g lysate protein per mice, SC) and survival was tracked upto 56 days. At day 56, splenocytes were analyzed for IFN- $\gamma$  secreting CD8<sup>+</sup> T cells (after re-stimulation with A20 tumor lysate in vitro for 72 hrs) and various immune cell populations by flow cytometry. \*P<0.05, \*\*P<0.01, \*\*\*P<0.001; \*\*\*\*P<0.0001; One way ANOVA with Tukey multiple comparison test.
