# Supplementary material
Source: PubMed Central journal article supplement (PMC5752379)
Supplement: jciinsight-2-92522-s002.pdf [file jciinsight-2-92522-s002.pdf]

**A**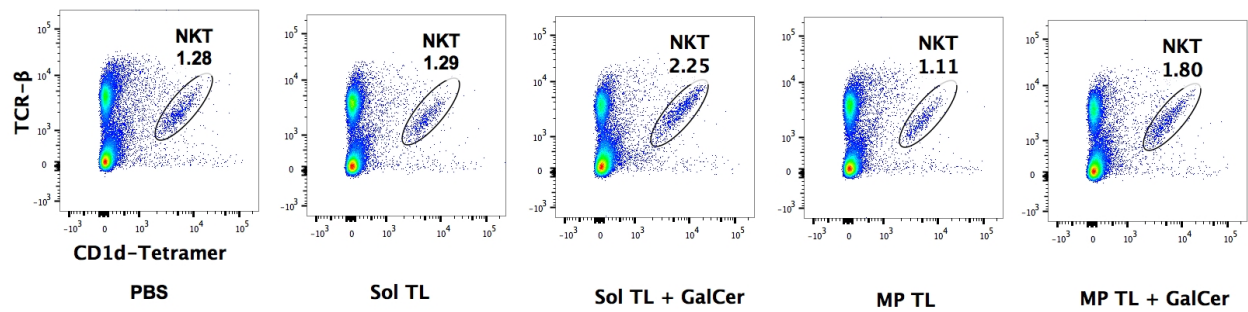**B**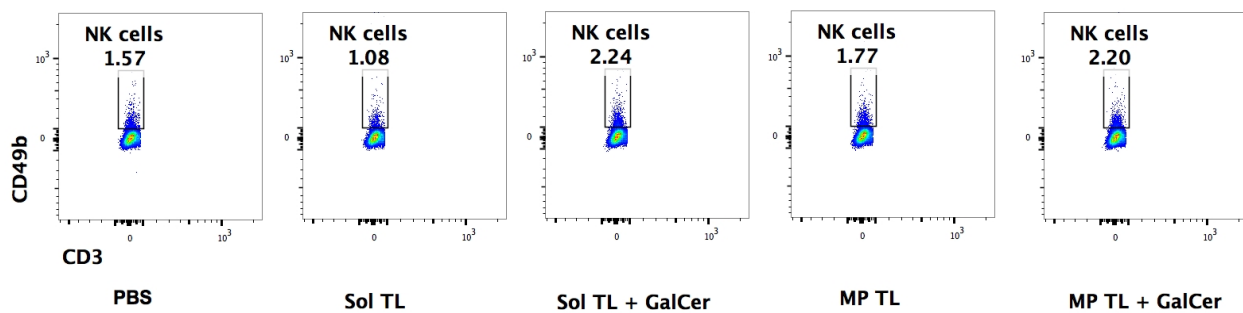

**Supplementary Figure 3.** Representative histogram showing (A) NKT cells (TCR-β<sup>+</sup> CD1d-Tetramer<sup>+</sup>), and (B) NK (CD3<sup>-</sup>CD49b<sup>+</sup>) population in lymph node at day 21 of mechanistic (time line shown in Figure 3A).

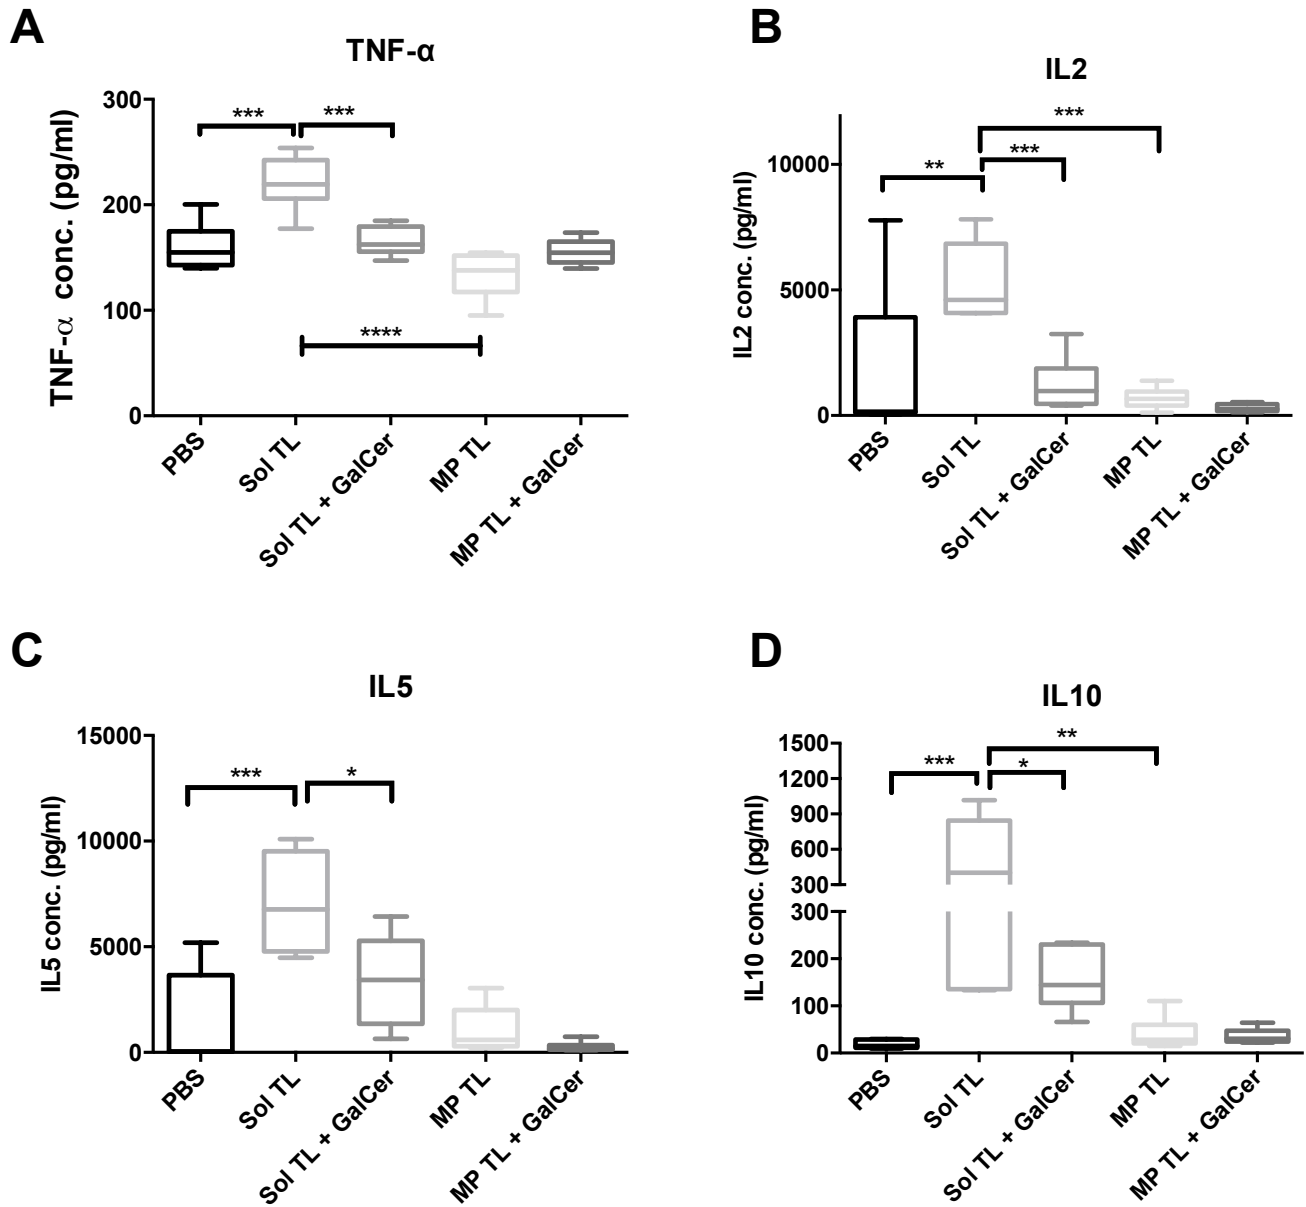

**Supplementary Figure 4.** Th1 and Th2 cytokines secreted by splenocytes following restimulation by A20 tumor lysate ex vivo. Balb/C mice (n=6) was first injected with  $2 \times 10^5$  A20 tumor cells on day 1 and then immunized with the formulations on days 8, 10, and 14. Then, a single IP injection of  $2 \mu\text{g}$  of  $\alpha$ -GalCer was done at day 17 only in  $\alpha$ -GalCer treatment groups. On day 21, all the mice were sacrificed and splenocytes ( $10^6$ /well of 96 well plate) were restimulated with A20 lysate (100  $\mu\text{g}$ /well) for 72 hrs in vitro and the culture media was analyzed for various Th1/Th2 cytokines using a multiplex kit. Data represent Mean  $\pm$  S.D. \* $P < 0.05$ , \*\* $P < 0.01$ , \*\*\* $P < 0.001$ ; One way ANOVA with Tukey multiple comparison test.
