# Supplementary material
Source: PubMed Central journal article supplement (PMC5752379)
Supplement: jciinsight-2-92522-s003.pdf [file jciinsight-2-92522-s003.pdf]

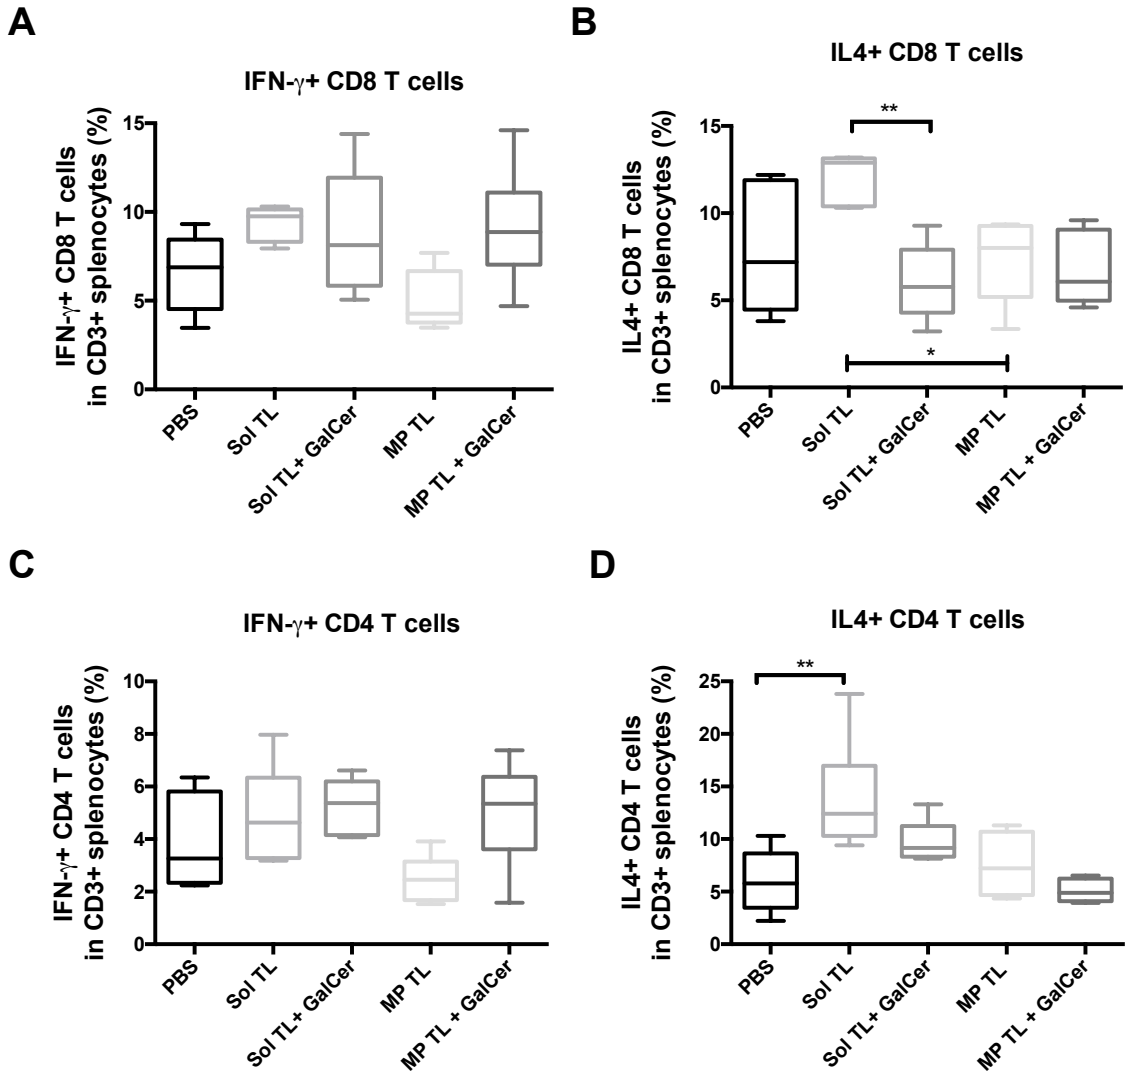

**Supplementary Figure 5.** CD4+ and CD8+ T cell responses of therapeutic A20 lysate vaccines. (A-B) IFN- $\gamma$  and IL4 secreting CD8 T cell percentage following restimulation of the splenocytes with A20 tumor lysate for 72 hrs; (C-D) IFN- $\gamma$  and IL4 secreting CD4 T cell percentage following restimulation of splenocytes with A20 tumor lysate; Balb/C mice (n=6) was first injected with  $2 \times 10^5$  A20 tumor cells on day 1 and then immunized with the formulations on days 8, 10, and 14. Then, a single IP injection of 2  $\mu$ g of  $\alpha$ -GalCer was done at day 17 only in  $\alpha$ -GalCer treatment groups. On day 21, splenocytes ( $10^6$ /well of 96 well plate) were restimulated with A20 lysate (100  $\mu$ g/well) for 72 hrs and stained and analyzed for IFN- $\gamma$ /IL4+, CD3+CD8+ and CD3+CD4+T cells using a flow cytometer. Data represent Mean (n=5-6)  $\pm$  S.D. \*P<0.05, \*\*P<0.01; One way ANOVA with Tukey multiple comparison test.

**A**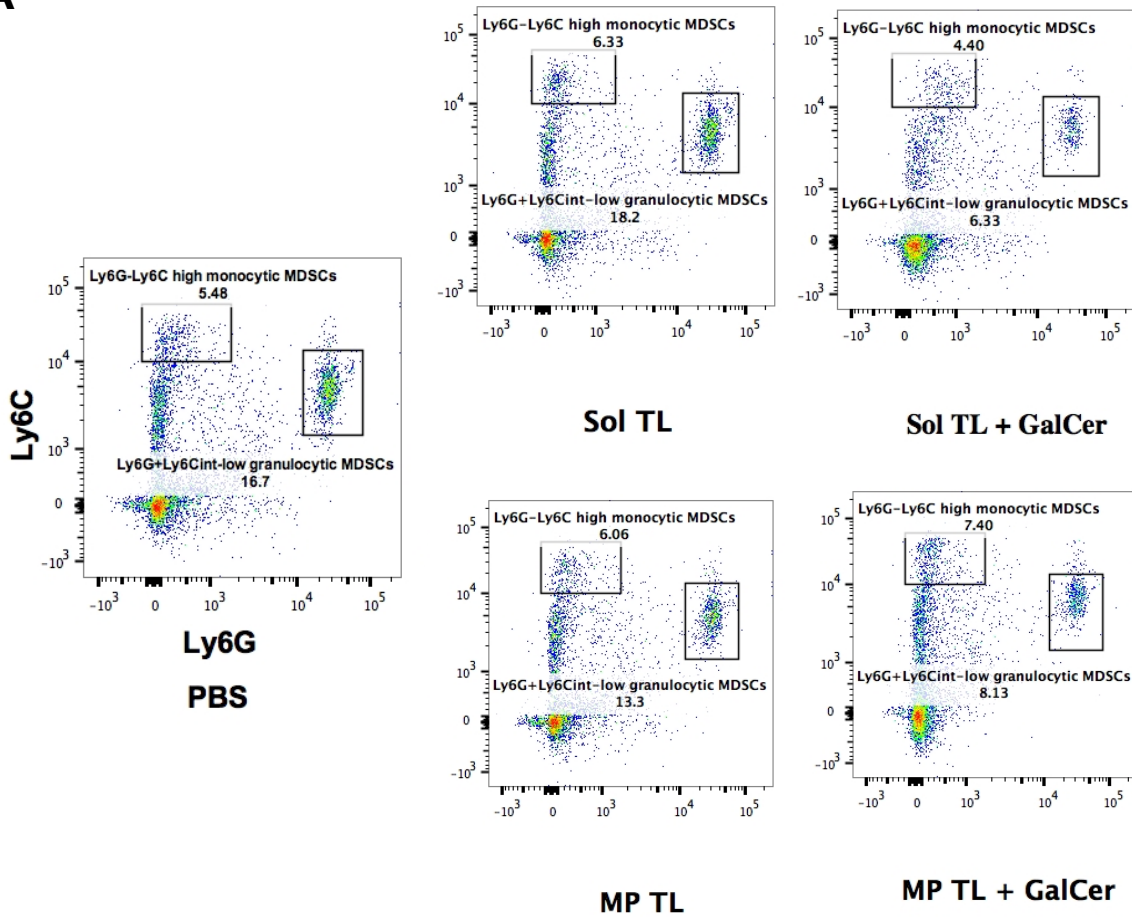**B**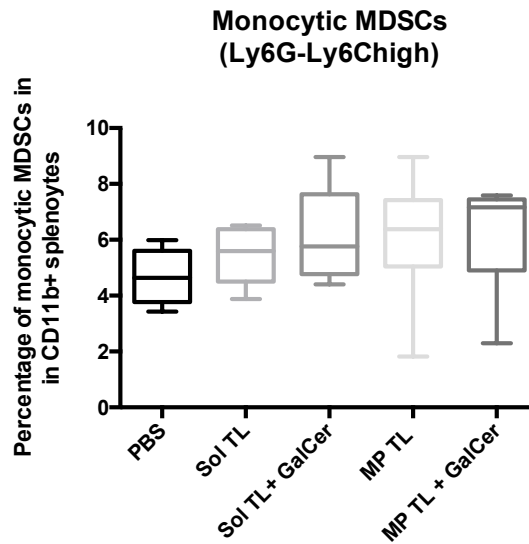

**Supplementary Figure 6.** (A) Representative histogram showing monocytic (Ly6G-Ly6C high) and granulocytic (Ly6G+Ly6C int-low) populations, and (B) Box plot showing percentage of monocytic MDSCs in CD11b<sup>+</sup> splenocytes of lymph nodes at day 21 of mechanistic studies (time line shown in Figure 3A). Data represent Mean (n=6)  $\pm$  S.D.
